# Supplementary material for: Effects of vaccine registration on disease prophylaxis: a systematic review
Source: PubMed Central journal article supplement (PMC9719654; doi:10.1186/s12938-022-01053-z), 2022-12-03
Supplement: 12938_2022_1053_MOESM3_ESM.pdf [file 12938_2022_1053_MOESM3_ESM.pdf]

**Additional file 3 - Excluded items and reasons for exclusion**

| <b>Reason for Exclusion</b>                                                 | <b>Quantity</b> |
|-----------------------------------------------------------------------------|-----------------|
| 1. Technological resources were not used for the immunization program       | 43              |
| 2. Technology used is not aimed at vaccine control devices                  | 6               |
| 3. The study carried out is not in humans                                   | 3               |
| 4. It is about the development or testing of the effectiveness of a vaccine | 3               |
| 5. It is at odds with the research topic:                                   | 3               |
| 6. Narrative Review                                                         | 2               |
| 7. Excluded due to technical problems                                       | 10              |
| <b>Total</b>                                                                | <b>70</b>       |
